# Supplementary material
Source: Springer Nature journal article supplement (https://www.springermedizin.de/resource/supplementary/12889_2012_5593_MOESM1_ESM.pdf/9495630)

## Cumulative mental health problems

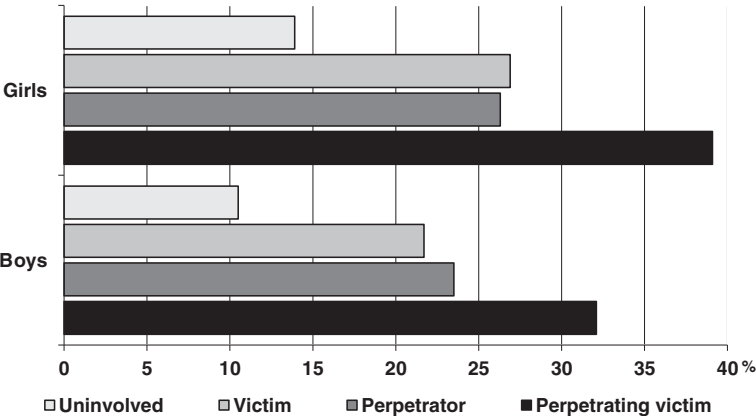

Supplement: MOESM1 [file 9495630]
